# Supplementary material for: Timing of complementary feeding is associated with gut microbiota diversity and composition and short chain fatty acid concentrations over the first year of life
Source: PubMed Central journal article supplement (PMC7065329; doi:10.1186/s12866-020-01723-9), 2020-03-11
Supplement: 12866_2020_1723_MOESM4_ESM.pdf [file 12866_2020_1723_MOESM4_ESM.pdf]

**A**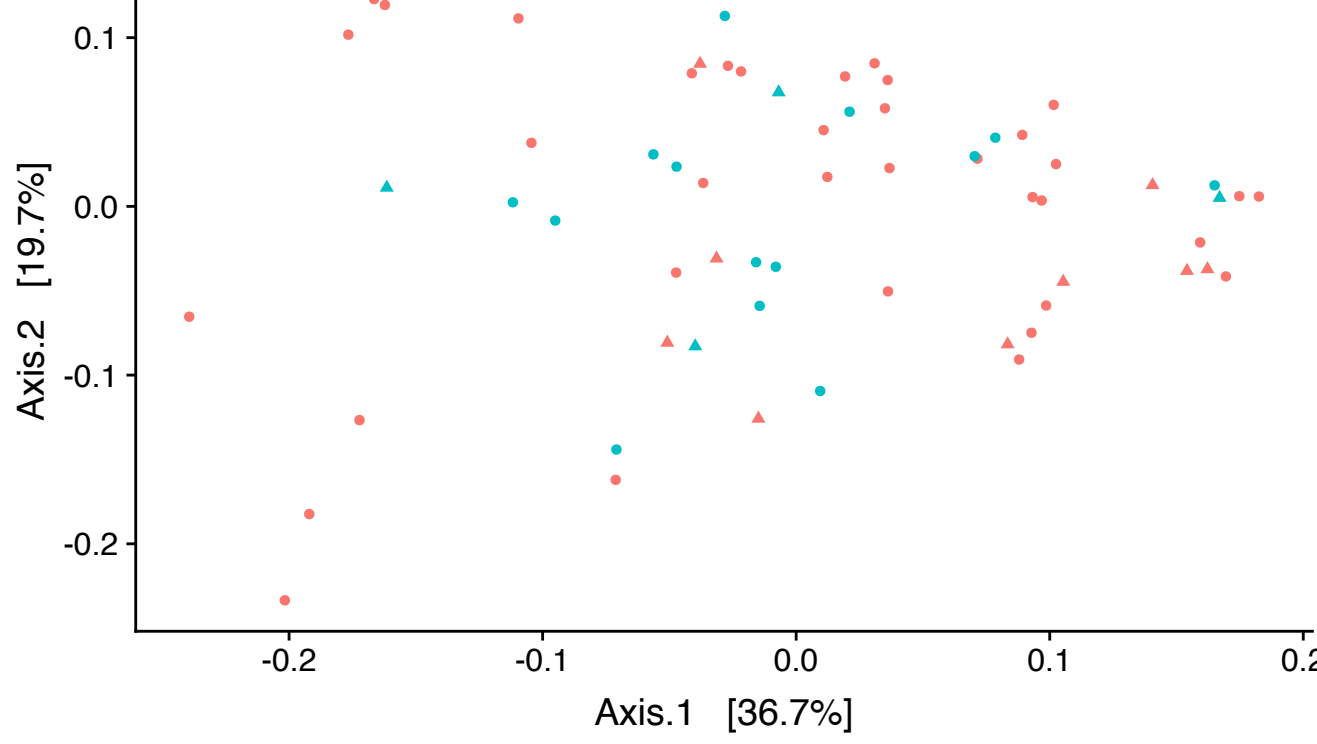**B**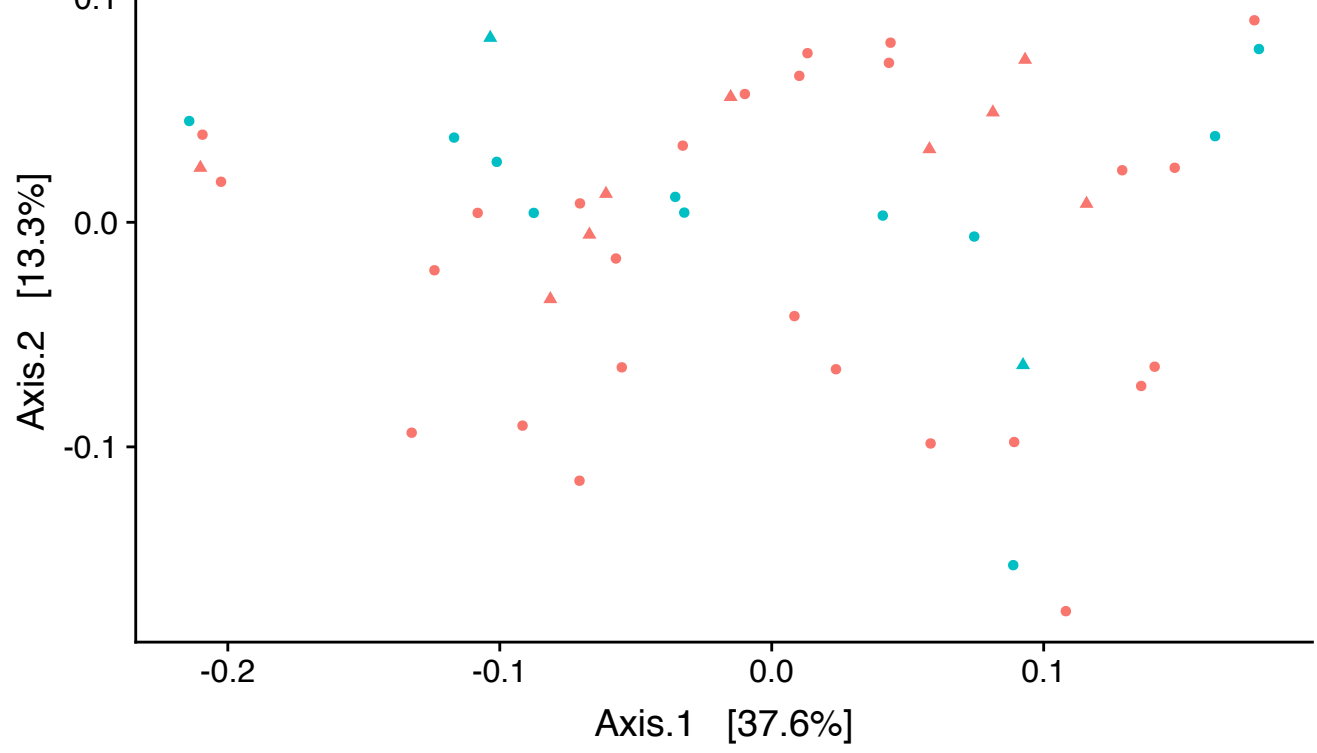

Timing of solids    ● Solids > 3 months    ● Ever breastfed  
                           ● Solids ≤ 3 months    ▲ Never breastfed
